# Supplementary material for: Effective psychological and psychosocial approaches to reduce repetition of self-harm: a systematic review, meta-analysis and meta-regression
Source: PubMed Central journal article supplement — BMJ Open. 2016 Sep 22;6(9):e011024. doi: 10.1136/bmjopen-2016-011024 (PMC5051331; doi:10.1136/bmjopen-2016-011024), 2016-09-22

# **Funnel plot of trials comparing any psychological or psychosocial intervention with any comparison condition for repetition of self-harm**

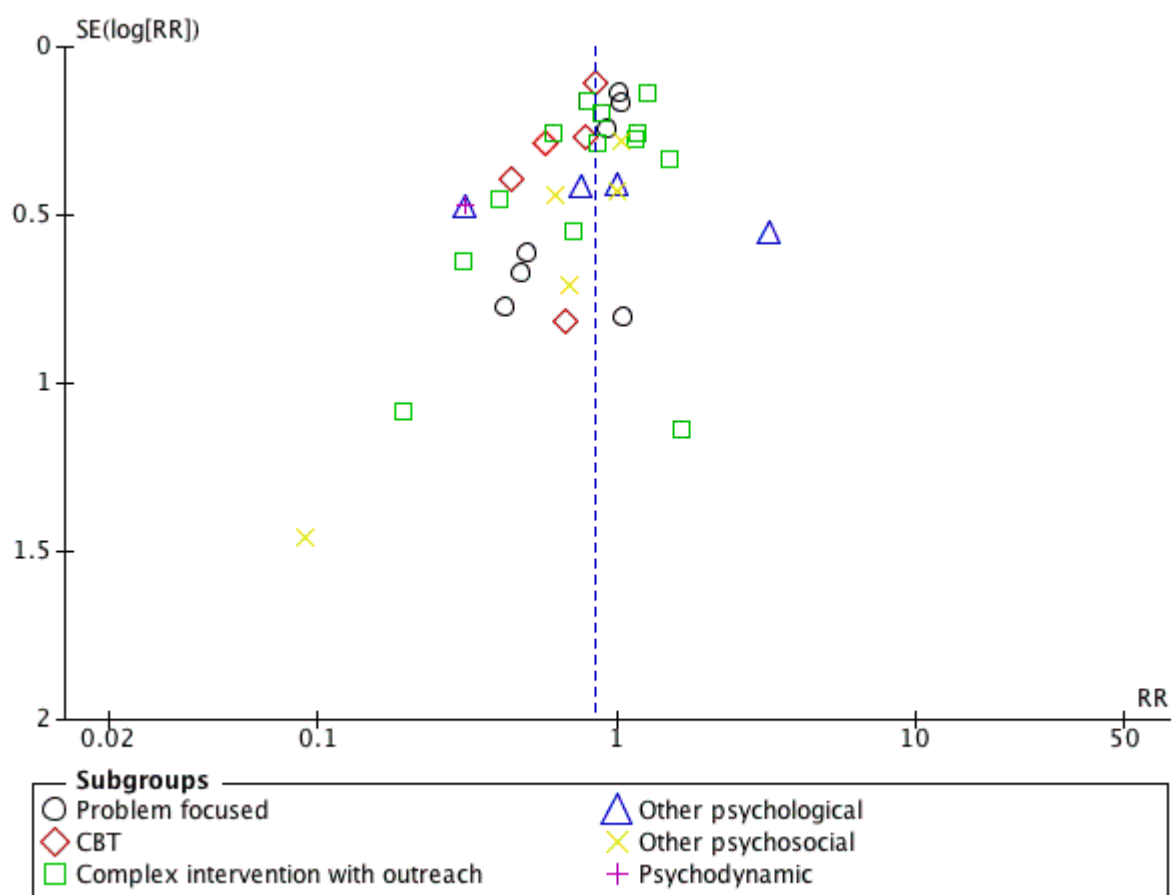

Supplement: bmjopen-2016-011024supp_figure.pdf [file bmjopen-2016-011024supp_figure.pdf]
