# Supplementary material for: Effective psychological and psychosocial approaches to reduce repetition of self-harm: a systematic review, meta-analysis and meta-regression
Source: PubMed Central journal article supplement — BMJ Open. 2016 Sep 22;6(9):e011024. doi: 10.1136/bmjopen-2016-011024 (PMC5051331; doi:10.1136/bmjopen-2016-011024), 2016-09-22
Supplement: bmjopen-2016-011024supp_tableS2.pdf [file bmjopen-2016-011024supp_tableS2.pdf]

**Online Supplement Table A2: Medline search strategy**

|     |                                                                                                                                                                                                                                                                                                                                            |
|-----|--------------------------------------------------------------------------------------------------------------------------------------------------------------------------------------------------------------------------------------------------------------------------------------------------------------------------------------------|
| 1.  | MH Self-Injurious Behavior+                                                                                                                                                                                                                                                                                                                |
| 2.  | MH Suicide Attempted+                                                                                                                                                                                                                                                                                                                      |
| 3.  | MH Suicide+                                                                                                                                                                                                                                                                                                                                |
| 4.  | TI (self poisoning or suicidal or self cutting or self harm or self injury or overdose or suicidal gesture or self inflicted or self destructive or automutilation) or AB (self poisoning or suicidal or self cutting or self harm or self injury or overdose or suicidal gesture or self inflicted or self destructive or automutilation) |
| 5.  | 1 or 2 or 3 or 4                                                                                                                                                                                                                                                                                                                           |
| 6.  | PT clinical trial                                                                                                                                                                                                                                                                                                                          |
| 7.  | TI clinical trial* or AB clinical trial* or MH clinical trial* or RN clinical trial*                                                                                                                                                                                                                                                       |
| 8.  | TI random* or AB random* or MH random* or RN random*                                                                                                                                                                                                                                                                                       |
| 9.  | TI placebo* or AB placebo*                                                                                                                                                                                                                                                                                                                 |
| 10. | TI groups or AB groups                                                                                                                                                                                                                                                                                                                     |
| 11. | PT meta-analysis                                                                                                                                                                                                                                                                                                                           |
| 12. | MH Meta-analysis                                                                                                                                                                                                                                                                                                                           |
| 13. | TI (meta-anal* or metaanal* or meta analy*) or AB (meta-anal* or metaanal* or meta analy*)                                                                                                                                                                                                                                                 |
| 14. | PT review                                                                                                                                                                                                                                                                                                                                  |
| 15. | TI (systematic review) or AB (systematic review)                                                                                                                                                                                                                                                                                           |
| 16. | 6 or 7 or 8 or 9 or 10 or 11 or 12 or 13 or 14 or 15                                                                                                                                                                                                                                                                                       |
| 17. | 5 and 16                                                                                                                                                                                                                                                                                                                                   |
