# Supplementary material for: Effective psychological and psychosocial approaches to reduce repetition of self-harm: a systematic review, meta-analysis and meta-regression
Source: PubMed Central journal article supplement — BMJ Open. 2016 Sep 22;6(9):e011024. doi: 10.1136/bmjopen-2016-011024 (PMC5051331; doi:10.1136/bmjopen-2016-011024), 2016-09-22
Supplement: bmjopen-2016-011024supp_tableS3.pdf [file bmjopen-2016-011024supp_tableS3.pdf]

Online Supplement Table A3: General characteristics of included trials

| Reference                    | Country     | Setting                            | Target group (n), age, % male             | Treatment                          | Comparison Group type/ TAU+ or Active controlled treatment | Does intervention group also receive TAU | Self harm inclusion criteria                                          | Self harm outcome measure    | Self rated suicidal ideation, depression, hopelessness outcome measures | Maximum follow-up (post index episode) | Results                                                                                                                                    | Control event rate % |
|------------------------------|-------------|------------------------------------|-------------------------------------------|------------------------------------|------------------------------------------------------------|------------------------------------------|-----------------------------------------------------------------------|------------------------------|-------------------------------------------------------------------------|----------------------------------------|--------------------------------------------------------------------------------------------------------------------------------------------|----------------------|
| <b>Problem focused</b>       |             |                                    |                                           |                                    |                                                            |                                          |                                                                       |                              |                                                                         |                                        |                                                                                                                                            |                      |
| Bannan 2010 <sup>69</sup>    | Ireland     | Emergency Department and Community | 18<br>29.5 years<br>Gender not reported   | Problem solving group therapy      | TAU+                                                       | Yes                                      | Self poisoning (at least one other episode within previous 12 months) | Repetition of self poisoning | BSSI, BDI, BHS                                                          | 2 months                               | INT 0/0<br>TAU+ 0/9<br>Non significant differences                                                                                         | 0%                   |
| Gibbons 1978 <sup>75</sup>   | UK          | Emergency Department and Community | 400<br>Age not reported (>17)<br>29% male | Problem focused case management    | TAU                                                        | No                                       | Self poisoning                                                        | Repetition of self poisoning | BDI (no data for MA)                                                    | 12 months                              | INT 27/200<br>TAU 29/200<br>Non significant differences                                                                                    | 14.5%                |
| Hatcher 2011 <sup>76</sup>   | New Zealand | Emergency Department and Community | 522<br>33.5 years<br>31.5% males          | Problem solving therapy            | TAU                                                        | Yes                                      | Self harm                                                             | Repetition of self harm      | BSSI, BDI, BHS                                                          | 12 months                              | INT 70/522<br>TAU 81/572<br>Non significant differences<br>(Significant differences seen in the subgroup who had previous episodes of DSH) | 14.2%                |
| Hawton 1987 <sup>48</sup>    | UK          | Emergency Department and Community | 80<br>Age not reported (>16)<br>34% male  | Brief problem-oriented counselling | TAU                                                        | No                                       | Self poisoning                                                        | Repetition of self poisoning | BDI (used baseline standard deviation)                                  | 12 months                              | INT 3/41<br>TAU 6/39<br>Non significant differences                                                                                        | 15.4%                |
| Husain 2014 <sup>49</sup>    | Pakistan    | Emergency Department and Community | 221<br>23.1 years<br>31% male             | Problem oriented CBT approach      | TAU                                                        | No                                       | Self harm                                                             | Repetition of self harm      | BSSI, BDI, BHS                                                          | 6 months                               | INT 3/108<br>TAU 3/113<br>Non significant differences                                                                                      | 2.7%                 |
| McAuliffe 2014 <sup>77</sup> | Ireland     | Emergency Department and Community | 433<br>33 years<br>35.5% male             | Problem solving group therapy      | TAU+                                                       | Yes                                      | Self harm                                                             | Repetition of self harm      | BSSI, BDI, BHS                                                          | 12 months                              | INT 54/222<br>TAU+ 50/211<br>Non significant                                                                                               | 23.7%                |

|                               |           |                                    |                                                            |                                                                                  |                                             |         |                                      |                               |                                 |           |                                                                                                               |              |
|-------------------------------|-----------|------------------------------------|------------------------------------------------------------|----------------------------------------------------------------------------------|---------------------------------------------|---------|--------------------------------------|-------------------------------|---------------------------------|-----------|---------------------------------------------------------------------------------------------------------------|--------------|
|                               |           |                                    |                                                            |                                                                                  |                                             |         |                                      |                               |                                 |           | differences                                                                                                   |              |
| McLeavey 1984 <sup>67</sup>   | Ireland   | Emergency Department and Community | 39<br>24.4 years<br>26% male                               | Problem solving skills training                                                  | Alternative controlled treatment comparison | No      | Self poisoning                       | Repetition of self poisoning  | BHS                             | 12 months | INT 2/19<br>CNT 5/20<br>Non significant differences                                                           | 25%          |
| Patsiokas 1985 <sup>84</sup>  | USA       | Inpatient                          | 15<br>Age and gender not reported                          | Two intervention arms:<br>1. Problem solving therapy; 2. Cognitive restructuring | Alternative controlled treatment comparison | Yes     | Suicide attempt                      | Suicidal Ideation             | BSSI, BHS                       | 3 weeks   | No self-harm outcomes<br>Non significant difference in SI between intervention groups and other therapy group | Not reported |
| Stewart 2009 <sup>85</sup>    | Australia | Emergency Department and Community | 32<br>mean age not reported (range 20 to 58)<br>46.9% male | Two intervention arms:<br>1. Problem solving therapy; 2. CBT                     | TAU                                         | Unclear | Suicide attempt                      | Repetition of suicide attempt | BSSI, BHS                       | 2 months  | No raw data reported:<br>significant differences between groups not described for self harm outcomes          | Not reported |
| Salkovskis 1990 <sup>68</sup> | UK        | Emergency Department and Community | 20<br>27.5 years<br>50% male                               | Problem solving approach                                                         | TAU                                         | Yes     | Suicide attempt (2 or more attempts) | Repetition of suicide attempt | BSSI, BDI, BHS (no data for MA) | 18 months | INT 3/12<br>TAU 4/8<br>Non significant differences                                                            | 50%          |
| <b>CBT</b>                    |           |                                    |                                                            |                                                                                  |                                             |         |                                      |                               |                                 |           |                                                                                                               |              |
| Brown 2005 <sup>50</sup>      | USA       | Emergency Department and Community | 109<br>18-66 years (average age not stated)<br>39% male    | CBT                                                                              | TAU+                                        | Yes     | Suicide attempt                      | Repetition of suicide attempt | BSSI, BDI, BHS                  | 18 months | INT 13/54<br>TAU+ 23/55<br>Significant difference                                                             | 41.8%        |

|                                            |                 |                                                      |                                                           |                       |                                             |     |                                                                                |                               |                                         |           |                                                              |                       |
|--------------------------------------------|-----------------|------------------------------------------------------|-----------------------------------------------------------|-----------------------|---------------------------------------------|-----|--------------------------------------------------------------------------------|-------------------------------|-----------------------------------------|-----------|--------------------------------------------------------------|-----------------------|
| Evans 1999 <sup>71</sup>                   | UK              | Emergency Department and Community                   | 32<br>16-50 years<br>(average age not stated)<br>38% male | CBT                   | TAU                                         | No  | Deliberate self harm with at least one other episode within previous 12 months | Repetition of self harm       | HADS                                    | 6 months  | INT 10/18<br>TAU 10/14<br>Non significant difference         | 71.4                  |
| Lieberman 1981 <sup>70</sup>               | USA             | Emergency Department and Community                   | 24<br>29.7 years<br>33% male                              | Behaviour therapy     | Alternative controlled treatment comparison | No  | Suicide attempt with at least one other SA within previous 24 months           | Repetition of suicide attempt | BDI                                     | 24 months | INT 2/12<br>CNT 3/12<br>Non significant difference           | 25%                   |
| Morely 2014 <sup>89</sup>                  | Australia       | Emergency Department and Community                   | 185<br>36.1 years<br>26% male                             | CBT                   | TAU                                         | Yes | Suicide attempt                                                                | Repetition of suicide attempt | BSSI<br>HADS                            | 6 months  | Not reported by group                                        | Not reported by group |
| Rudd 2015 <sup>66</sup>                    | USA             | Psychiatric hospitalisation and community (Military) | 152<br>27.4 years<br>87.5% male                           | CBT                   | TAU                                         | Yes | Suicide attempt and/or suicidal ideation with intent to die                    | Repetition of suicide attempt | BSSI, BDI,<br>BHS                       | 24 months | INT 8/76<br>TAU 18/76<br>Significant difference              | 23.7%                 |
| Slee 2008 <sup>90</sup>                    | The Netherlands | Emergency Department and Community                   | 90<br>24.5 years<br>6% male                               | CBT                   | TAU                                         | Yes | Self harm                                                                      | Frequency of self harm        | BDI, Suicide Cognition Scale            | 9 months  | CBT 1.18 (4.22)<br>TAU 4.58 (8.37)<br>Significant difference | Not reported          |
| Tyrer 2003 <sup>78</sup>                   | UK              | Emergency Department and Community                   | 430<br>32 years<br>32% male                               | CBT                   | TAU+                                        | No  | Deliberate self harm with at least one previous episode                        | Repetition of self harm       | HADS (used baseline standard deviation) | 12 months | INT 84/215<br>TAU+ 99/215<br>Non significant difference      | 46.0%                 |
| <b>Psychodynamic</b>                       |                 |                                                      |                                                           |                       |                                             |     |                                                                                |                               |                                         |           |                                                              |                       |
| Gurthrie 2001 <sup>51</sup>                | UK              | Emergency Department and Community                   | 119<br>31.2 years<br>45% male                             | Psychodynamic therapy | TAU                                         | No  | Deliberate self poisoning                                                      | Repetition of self harm       | BSSI, BDI                               | 6 months  | INT 5/58<br>TAU 17/61<br>Significant difference              | 27.9%                 |
| <b>Complex Interventions with Outreach</b> |                 |                                                      |                                                           |                       |                                             |     |                                                                                |                               |                                         |           |                                                              |                       |

|                            |                     |                                    |                                                              |                                                                                                                                                                                                                                                      |                                             |     |                                  |                               |               |           |                                                                                         |       |
|----------------------------|---------------------|------------------------------------|--------------------------------------------------------------|------------------------------------------------------------------------------------------------------------------------------------------------------------------------------------------------------------------------------------------------------|---------------------------------------------|-----|----------------------------------|-------------------------------|---------------|-----------|-----------------------------------------------------------------------------------------|-------|
| Allard 1992 <sup>52</sup>  | Canada              | Emergency Department and Community | 126<br>Age not reported<br>45% male                          | Intensive intervention including therapy and case management                                                                                                                                                                                         | TAU                                         | No  | Suicide attempt                  | Repetition of SA              | None          | 24 months | INT 22/63<br>TAU 19/63<br>Non significant difference                                    | 30.2% |
| Clarke 2002 <sup>80</sup>  | UK                  | Emergency Department and Community | 467<br>33 years<br>44% male                                  | Case management to facilitate engagement in treatment                                                                                                                                                                                                | TAU                                         | Yes | Deliberate self harm             | Repetition of self harm       | None          | 12 months | INT 19/220<br>TAU 25/247<br>Non significant differences                                 | 10.1% |
| Comtois 2011 <sup>73</sup> | USA                 | Emergency Department and Community | 20<br>37 years<br>38% male                                   | The Collaborative Assessment and Management of Suicidality (CAMS) is an approach to assessment and intervention that focused on suicide-related factors and current risk and ends with a treatment plan that always includes a crisis response plan. | TAU+                                        | No  | Suicide attempt or imminent risk | Repetition of suicide attempt | BSSI          | 12 months | INT 2/11<br>TAU 1/9<br>Statistical tests not conducted                                  | 11.1% |
| Hatcher 2015 <sup>82</sup> | New Zealand         | Emergency Department and Community | 684<br>36 years<br>34% male                                  | Intensive follow-up to ensure engagement in problem solving therapy and including ongoing postcard contact                                                                                                                                           | TAU                                         | Yes | Self harm                        | Repetition of self harm       | HADS, BHS     | 12 months | INT 86/737<br>TAU 75/737<br>Non significant differences                                 | 9.6%  |
| Hatcher 2016 <sup>65</sup> | New Zealand (Maori) | Emergency Department and Community | 167<br>32.3<br>35% male                                      | Intensive follow-up to ensure engagement in problem solving therapy and including ongoing postcard contact                                                                                                                                           | TAU                                         | Yes | Self harm                        | Repetition of self harm       | HADS, BHS     | 12 months | INT 34/95<br>TAU 29/72<br>Non significant difference at 12 months                       | 40.3% |
| Hawton 1981 <sup>47</sup>  | UK                  | Emergency Department and Community | 96<br>25.3 years<br>30% male                                 | Brief problem-oriented counselling delivered at home                                                                                                                                                                                                 | Alternative controlled treatment comparison | No  | Self poisoning                   | Repetition of self harm       | None          | 12 months | INT 5/48<br>CNT (outpatient problem solving therapy) 7/48<br>Non significant difference | 14.6% |
| Hvid 2011 <sup>55</sup>    | Denmark             | Emergency Department and Community | 134<br>46 years for men and 34 years for women<br>28.5% male | Intensive intervention with solution focused counselling, rapid response and outreach                                                                                                                                                                | TAU                                         | No  | Suicide attempt or self harm     | Repetition of suicide attempt | None          | 12 months | INT 6/69<br>TAU+ 14/65<br>Significant difference                                        | 21.5% |
| Kawanishi                  | Japan               | Emergency                          | 758                                                          | Assertive case                                                                                                                                                                                                                                       | TAU+                                        | Yes | Suicide                          | Repetition of                 | BHS (outcome) | 18 months | INT 55/373                                                                              | 18.4% |

|                                  |                 |                                                        |                                     |                                                                                                                           |                  |     |                                                                                |                               |                    |           |                                                                                                          |              |
|----------------------------------|-----------------|--------------------------------------------------------|-------------------------------------|---------------------------------------------------------------------------------------------------------------------------|------------------|-----|--------------------------------------------------------------------------------|-------------------------------|--------------------|-----------|----------------------------------------------------------------------------------------------------------|--------------|
| 2014 <sup>81</sup>               |                 | Department and Community                               | 42.3 years<br>43.8% male            | management with focus on ensuring attendance at psychiatric treatment                                                     |                  |     | attempt                                                                        | suicide attempt or suicide    | data not reported) |           | TAU+ 71/385<br>Non significant difference                                                                |              |
| Litman 1976 <sup>86</sup>        | USA             | Community (Suicide prevention call line and follow-up) | 400<br>Age and gender not reported  | Volunteer continuing relationship management                                                                              | TAU              | Yes | “At Risk”                                                                      | Repetition of suicide attempt | None               | Unclear   | No raw data reported; authors report non significant differences between intervention and TAU            | Not reported |
| Marasinghe 2012 <sup>57</sup>    | Sri Lanka       | Emergency Department and Community                     | 68<br>31.1 years<br>50% male        | Problem solving approach, meditation, an intervention to increase social support, advice on reducing drug and alcohol use | Waitlist control | Yes | Suicide attempt                                                                | Repetition of self harm       | BSSI, BDI          | 12 months | No raw data or analysis presented; authors state no difference between intervention group and TAU in DSH | No reported  |
| Morthorst 2012 <sup>92</sup>     | Denmark         | Emergency Department and community                     | 243<br>31 years<br>24% male         | Assertive case management with rapid response, outreach and problem oriented approach                                     | TAU              | Yes | Suicide attempt                                                                | Repetition of suicide attempt | None               | 12 months | INT 20/123<br>TAU 13/120<br>Non significant differences                                                  | 10.8%        |
| van der Sande 1997 <sup>53</sup> | The Netherlands | Emergency Department and community                     | 274<br>Age not reported<br>34% male | Inpatient admission plus outpatient problem oriented counselling                                                          | TAU              | No  | Suicide attempt                                                                | Repetition of suicide attempt | BHS                | 12 months | INT 24/140<br>TAU 20/134<br>Non significant differences                                                  | 14.9%        |
| van Heeringen 1995 <sup>79</sup> | Belgium         | Emergency Department and community                     | 391<br>Age not reported<br>57% male | Compliance enhancement treatment                                                                                          | TAU              | No  | Suicide attempt                                                                | Repetition of suicide attempt | None               | 12 months | INT 21/196<br>TAU 34/195<br>Significant difference                                                       | 17.4%        |
| Wei 2013 <sup>56</sup>           | China           | Emergency Department and Community                     | 157<br>32.3 years<br>24% male       | Telephone intervention that included psychological support and collaborative problem solving                              | No treatment     | No  | Suicide attempt (unclear but indication that it is first time attempters only) | Repetition of suicide attempt | BSSI               | 12 months | CBT 1/82<br>Telephone 1/80<br>No treatment 5/77<br>Non significant differences                           | 6.5%         |
| Welu 1977 <sup>54</sup>          | USA             | Emergency Department and Community                     | 119<br>Age and gender not reported  | Formulation driven intervention including psychotherapy, crisis                                                           | TAU              | No  | Suicide attempt                                                                | Repetition of suicide attempt | None               | 4 months  | INT 3/62<br>TAU 9/57<br>Significant                                                                      | 15.8%        |

|                                   |             |                                    |                                     |                                                                              |                                             |     |                            |                                            |                                 |           |                                                                                                            |              |  |
|-----------------------------------|-------------|------------------------------------|-------------------------------------|------------------------------------------------------------------------------|---------------------------------------------|-----|----------------------------|--------------------------------------------|---------------------------------|-----------|------------------------------------------------------------------------------------------------------------|--------------|--|
|                                   |             |                                    |                                     | intervention, family therapy or other technique                              |                                             |     |                            |                                            |                                 |           |                                                                                                            | difference   |  |
| <b>Other psychological</b>        |             |                                    |                                     |                                                                              |                                             |     |                            |                                            |                                 |           |                                                                                                            |              |  |
| Dubois 1999 <sup>58</sup>         | France      | Emergency Department and community | 84<br>22.4 reported<br>20% male     | Psychotherapy (no further description)                                       | TAU                                         | No  | Suicide attempt            | Repetition of self harm                    | None                            | 12 months | INT 8/43<br>TAU 10/41<br>Non significant differences                                                       | 24.4%        |  |
| Gysin-Maillart 2016 <sup>64</sup> | Switzerland | Emergency Department and Community | 120<br>37.8 years<br>45% male       | Attempted Suicide Short Intervention Program (ASSIP)                         | TAU                                         | Yes | Suicide attempt            | Repetition of suicide attempt              | BSSI, BDI                       | 24 months | INT 5/60<br>TAU 16/60<br>Significant differences                                                           | 26.6%        |  |
| Tapolaa 2010 <sup>87</sup>        | Finland     | Emergency Department and community | 16<br>34 years<br>0% male           | Acceptance Commitment Therapy and Solution Focused Brief Therapy             | TAU                                         | Yes | Deliberate self harm       | Frequency of self harm                     | BDI (outcome data not reported) | 6 months  | No raw data or analysis presented; authors state no difference between intervention and treatment as usual | Not reported |  |
| Torhorst 1987 <sup>59</sup>       | Germany     | Emergency Department and community | 141<br>Age not reported<br>37% male | Same therapist                                                               | Alternative controlled treatment comparison | Yes | Suicide attempt            | Repetition of suicide attempt              | None                            | 12 months | Same therapist 12/68<br>Different therapist 4/73<br>Significant difference                                 | 5.5%         |  |
| Torhorst 1988 <sup>60</sup>       | Germany     | Emergency Department and community | 80<br>Age and gender not reported   | 12 sessions of therapy delivered over 3 months                               | Alternative controlled treatment comparison | No  | Suicide attempt (repeated) | Repetition of suicide attempt              | None                            | 12 months | Short term therapy 9/40<br>Long term therapy 9/40<br>Non significant differences                           | 22.5%        |  |
| <b>Other psychosocial</b>         |             |                                    |                                     |                                                                              |                                             |     |                            |                                            |                                 |           |                                                                                                            |              |  |
| Armitage 2016 <sup>91</sup>       | Malaysia    | Emergency Department and self help | 226<br>30.05 years<br>30.1% male    | Self-generated plan not to self harm with or without a volitional help sheet | Alternative controlled treatment comparison | NA  | Self harm                  | Suicidal ideation and behaviour (combined) | SBQ, BDI-II                     | 3 months  | No self harm outcomes; Significant difference between intervention groups and control group                | Not reported |  |

|                               |        |                                    |                                  |                                                                   |     |     |                                         |                               |                                                                |           |                                                                                               |              |
|-------------------------------|--------|------------------------------------|----------------------------------|-------------------------------------------------------------------|-----|-----|-----------------------------------------|-------------------------------|----------------------------------------------------------------|-----------|-----------------------------------------------------------------------------------------------|--------------|
| Crawford 2010 <sup>61</sup>   | UK     | Emergency Department and community | 103<br>37.2 years<br>53% male    | Appointment card for specialist outpatient appointment            | TAU | No  | Deliberate self harm and alcohol misuse | Repetition of self harm       | None                                                           | 6 months  | INT 7/52<br>TAU 11/51<br>Non significant differences                                          | 21.6%        |
| Grimholt 2015 <sup>62</sup>   | Norway | Emergency Department and community | 143<br>27.75 years<br>25.5% male | Structured GP consultations                                       | TAU | Yes | Self poisoning                          | Repetition of self harm       | BSSI, BDI, BHS                                                 | 6 months  | INT 8/60<br>TAU 11/83<br>No significant difference                                            | 13.3%        |
| Mouaffak 2015 <sup>83</sup>   | France | Emergency Department and community | 302<br>38.8 years<br>24.7% male  | Organisation of Suitable Monitoring for Suicide Attempters (OSTA) | TAU | Y   | Suicide attempt                         | Repetition of suicide attempt | None                                                           | 12 months | INT 22/152<br>TAU 21/150<br>Non significant differences                                       | 14%          |
| O'Connor 2015 <sup>88</sup>   | USA    | Inpatient                          | 30<br>41.35 years<br>73.3% male  | Teachable moment brief intervention                               | TAU | Y   | Suicide attempt                         | Suicidal ideation             | BSSI                                                           | 1 month   | No self harm outcomes; no significant difference between groups on suicidal ideation reported | Not reported |
| Wang 2016 <sup>74</sup>       | Taiwan | Emergency Department and community | 64<br>37.95 years<br>26.6% male  | Coping cards                                                      | TAU | Y   | Suicide attempt                         | Repetition of suicide attempt | BSRS-R (single item for depression and suicidal ideation), BHS | 3 months  | INT 0/32<br>TAU 5/32<br>Significant differences                                               | 15.6%        |
| Waterhouse 1990 <sup>72</sup> | UK     | Emergency department and Inpatient | 52<br>30 years<br>38% male       | Hospital admission                                                | TAU | No  | Parasuicide                             | Repetition of parasuicide     | BHS                                                            | 4 months  | Admission 3/27<br>Discharge 4/25<br>Non significant differences                               | 16.0%        |

<sup>a</sup> BSSI: Beck Scale for Suicidal Ideation; BDI: Beck Depression Inventory; BHS: Beck Hopelessness Scale; HADS: Hospital and Anxiety Depression Scale (Depression subscale); Brief Symptoms Rating Scale-Revised: BSRS-R; Suicidal Behaviours Questionnaire: SBQ
